# Supplementary material for: Gamma Tocopherol Reduced Chemotherapeutic-Induced ROS in an Ovarian Granulosa Cell Line, But Not in Breast Cancer Cell Lines In Vitro
Source: MDPI journal article supplement (doi:10.3390/antiox9010051), 2020-01-07
Supplement: s1 [file s1]

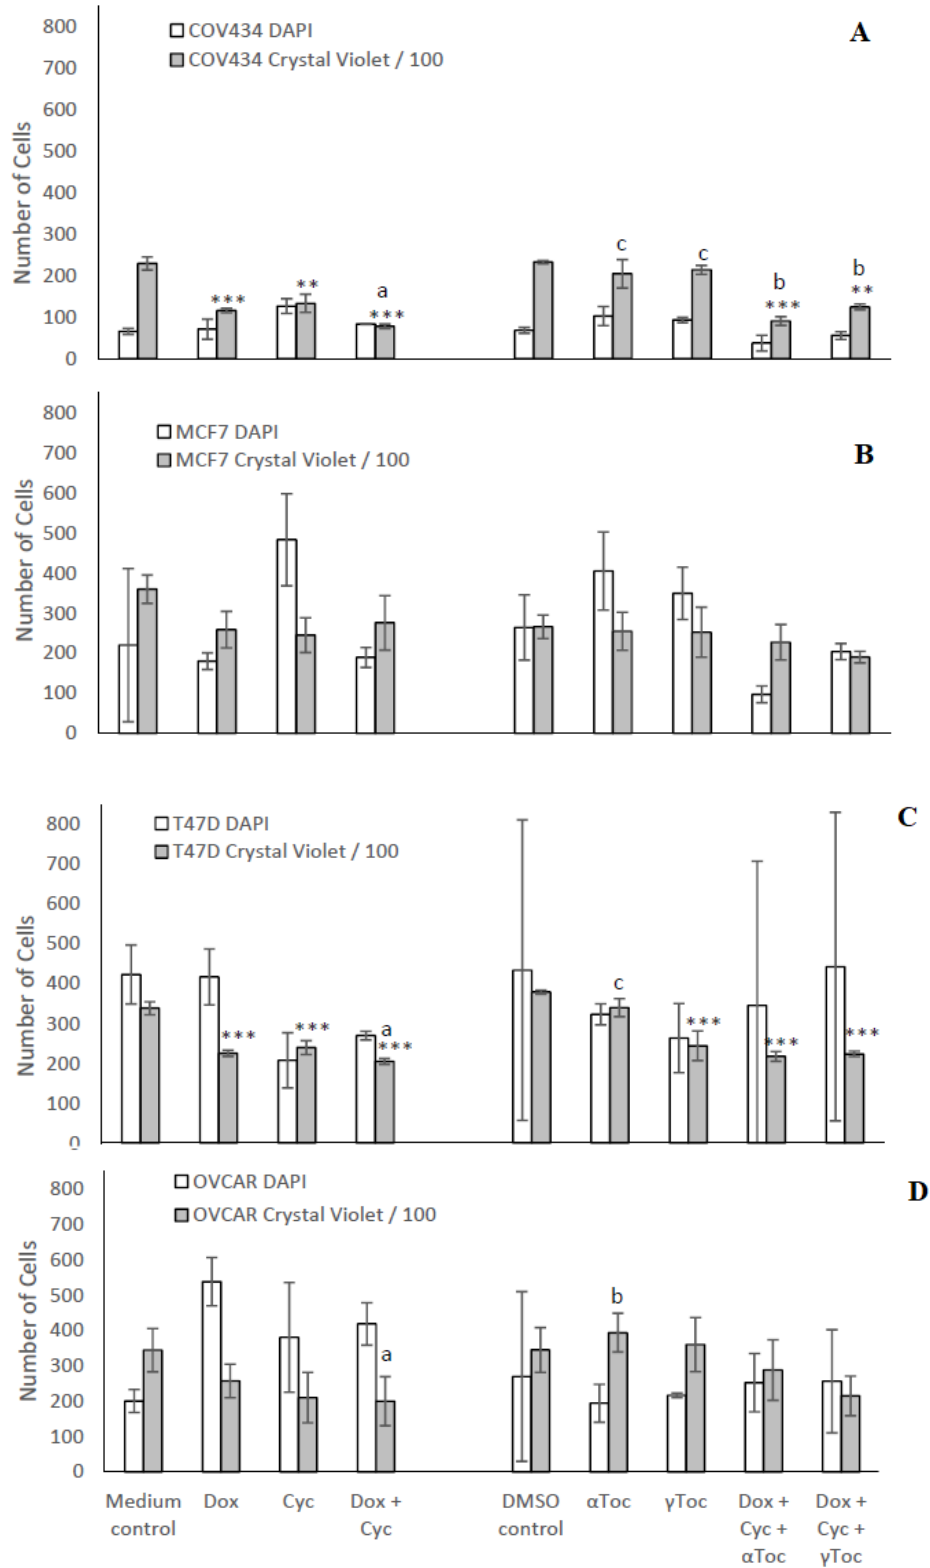

**Figure S1:** Comparison of DAPI and Crystal Violet Datasets: The numbers of human COV434 (A), MCF7 (B), T47D (C) and OVCAR (D) cells per well that were determined using a crystal violet assay were divided by 100 to allow comparison with the DAPI dataset on the same axis. The crystal violet values show mean  $\pm$  stdev ( $n = 3$ ). The DAPI values are the sum of nuclei with ‘condensed’ + ‘uncertain’ + normal morphologies scored in images from three replicate experiments. Each group of apoptotic bodies were assumed to have been formed by the fragmentation of a single nucleus and

were therefore given a score of '1'. These were added to the numbers of small, irregularly shaped DAPI-dense nuclei. Nuclei classified as 'uncertain' formed 8.9% (COV434), 2.4% (MCF7), 1.4% (OVCAR) and 1.2% (T47D) of the total numbers of nuclei in all assessed images, whereas the normal nuclei formed 85% (COV434), 95% (MCF7), 94% (OVCAR) and 97.2% (T47D). DAPI values shown as the mean  $\pm$  stdev ( $n = 3$ ). The crystal violet cell data were subjected to 1Way ANOVA with a Tukey post-test. Significant difference from control. \*\*  $p > 0.01$ , \*\*\*  $p > 0.001$ , or a v b  $p > 0.05$ , a v c  $p > 0.001$ .

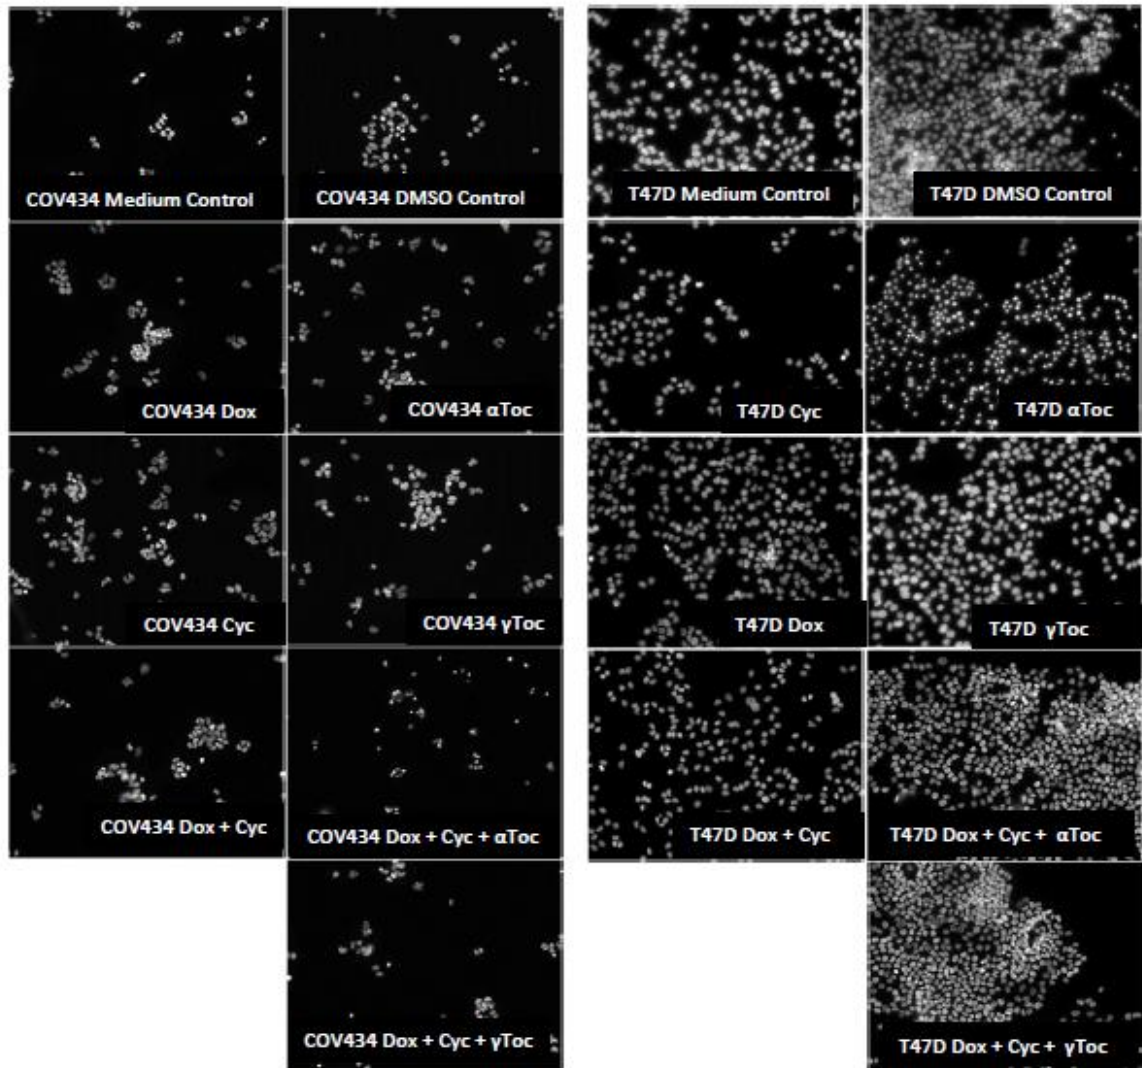

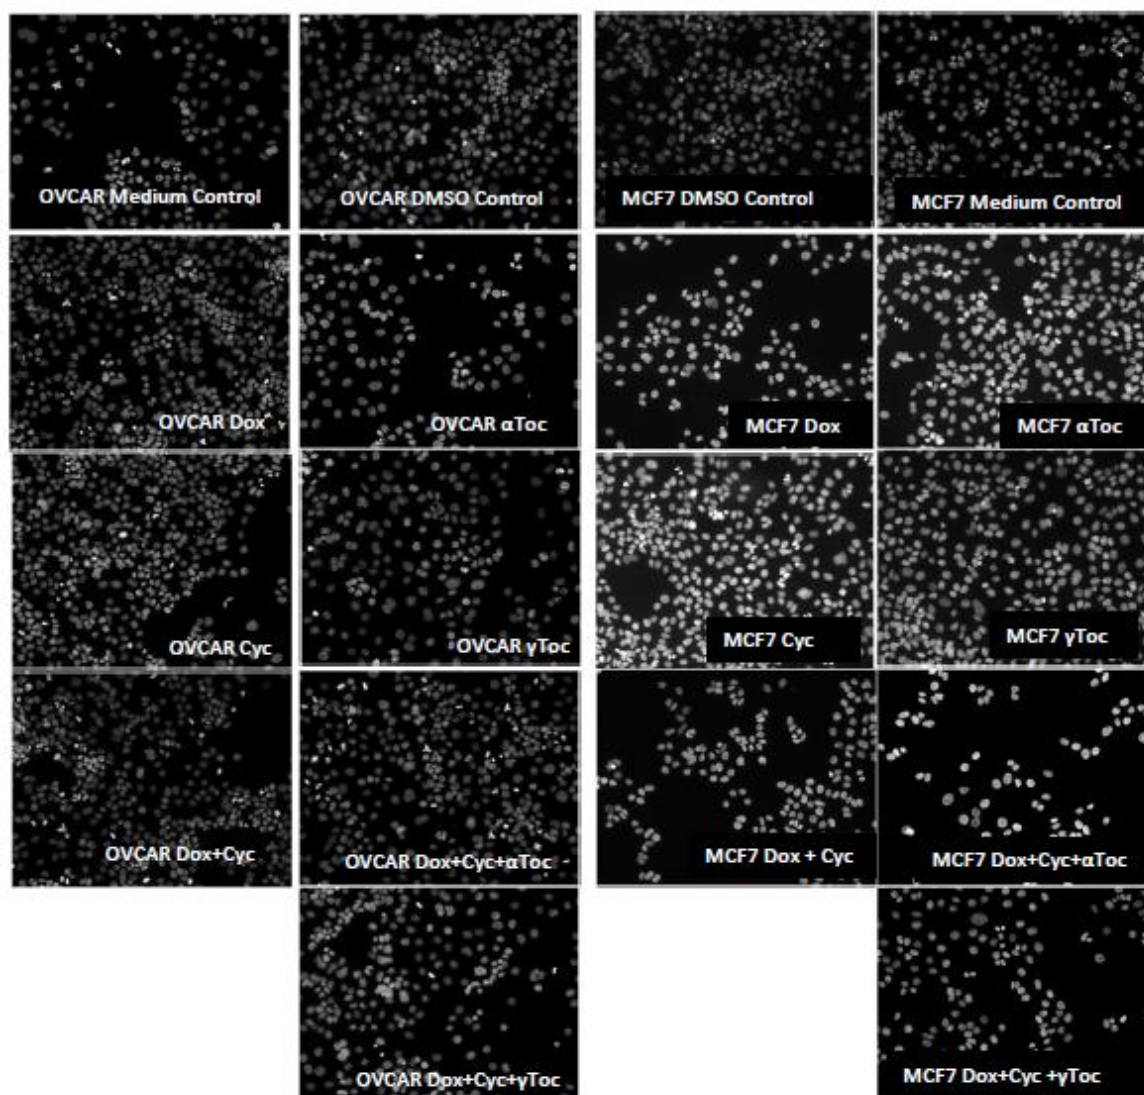

**Figure S2:** Images of DAPI-stained cell nuclei obtained using an Olympus AX70 fluorescence microscope at  $\times 20$  magnification after cells were exposed to chemotherapeutics and tocopherols for 24 h. Dox—doxorubicin, Cyc—cyclophosphamide, Toc—tocopherol.
